# Supplementary material
Source: bioRxiv or medRxiv preprint supplement (https://www.biorxiv.org/highwire/filestream/92415/field_highwire_adjunct_files/0/264184-1.pdf)

# Figure supplement 1

**A**

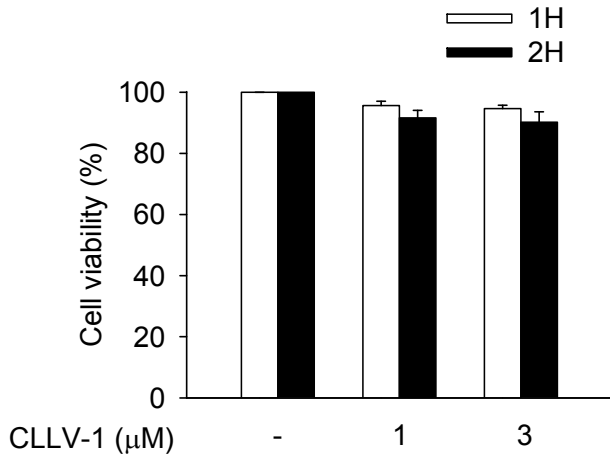

**B**

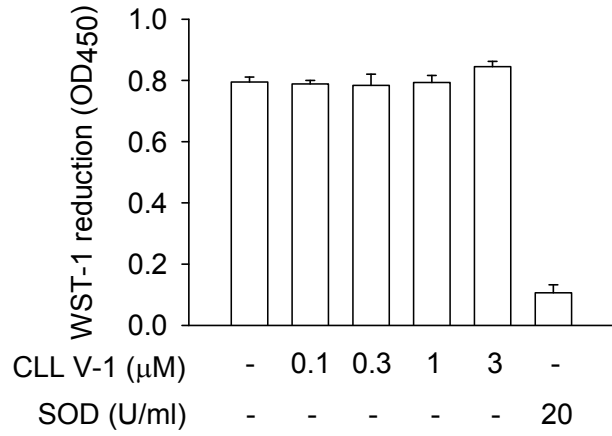

**C**

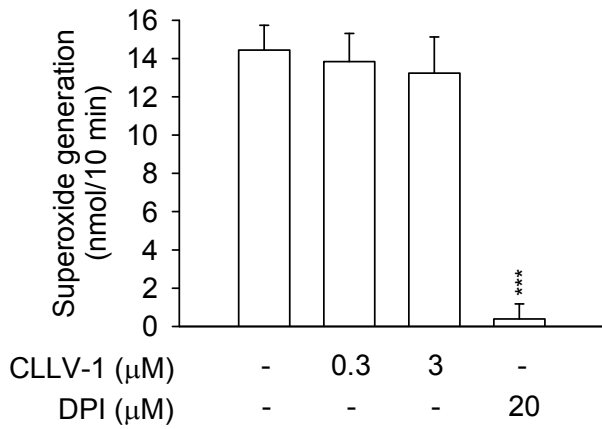

**D**

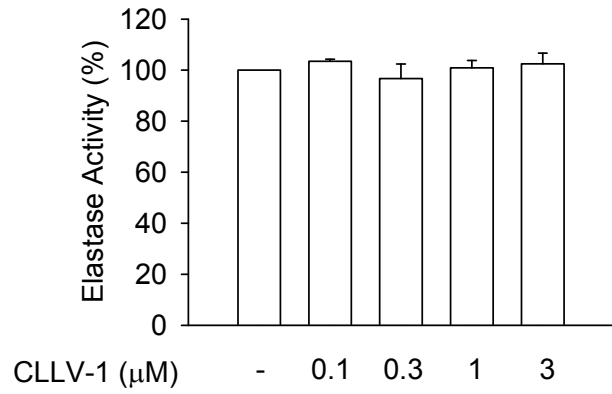

**E**

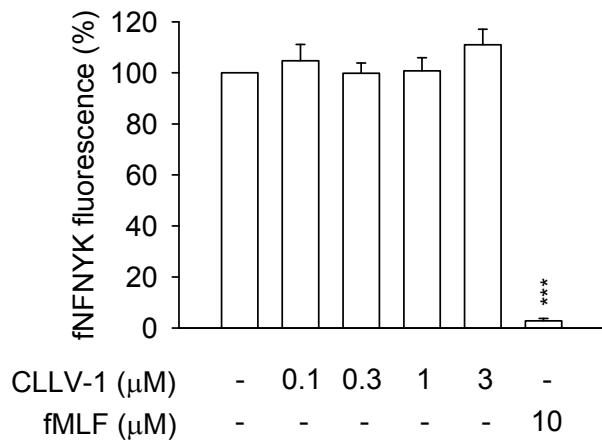

Figure supplement 2

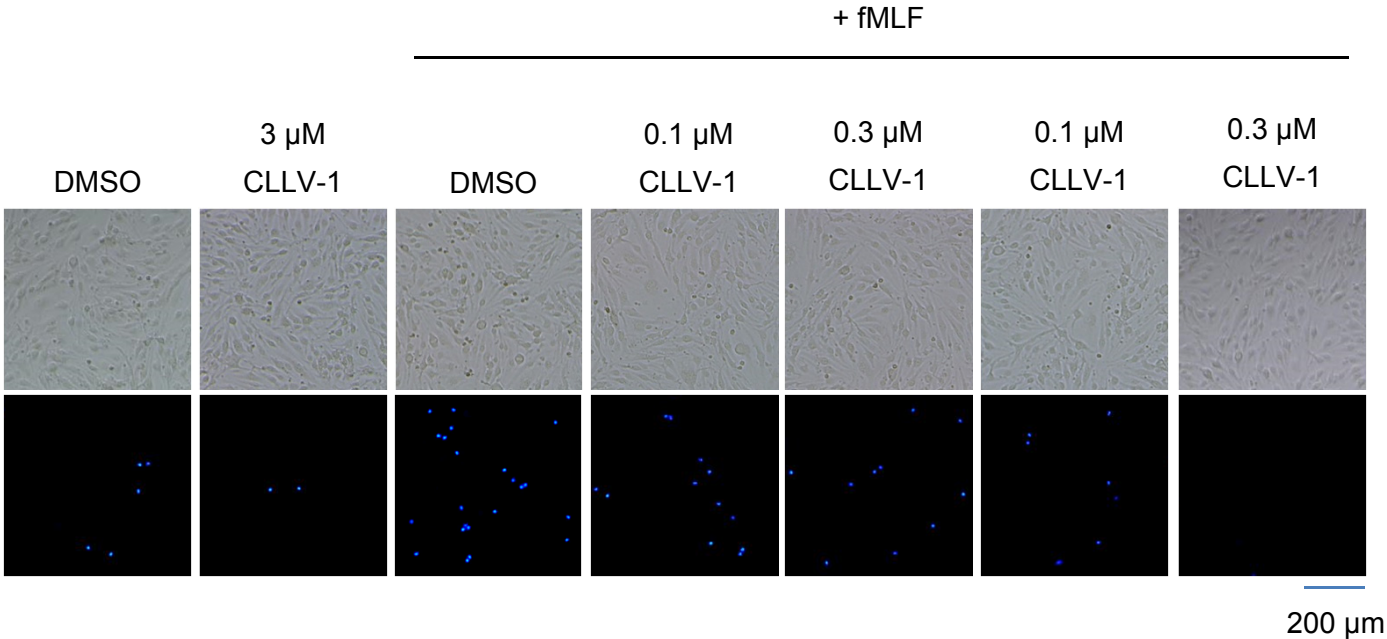

## Figure supplement 3

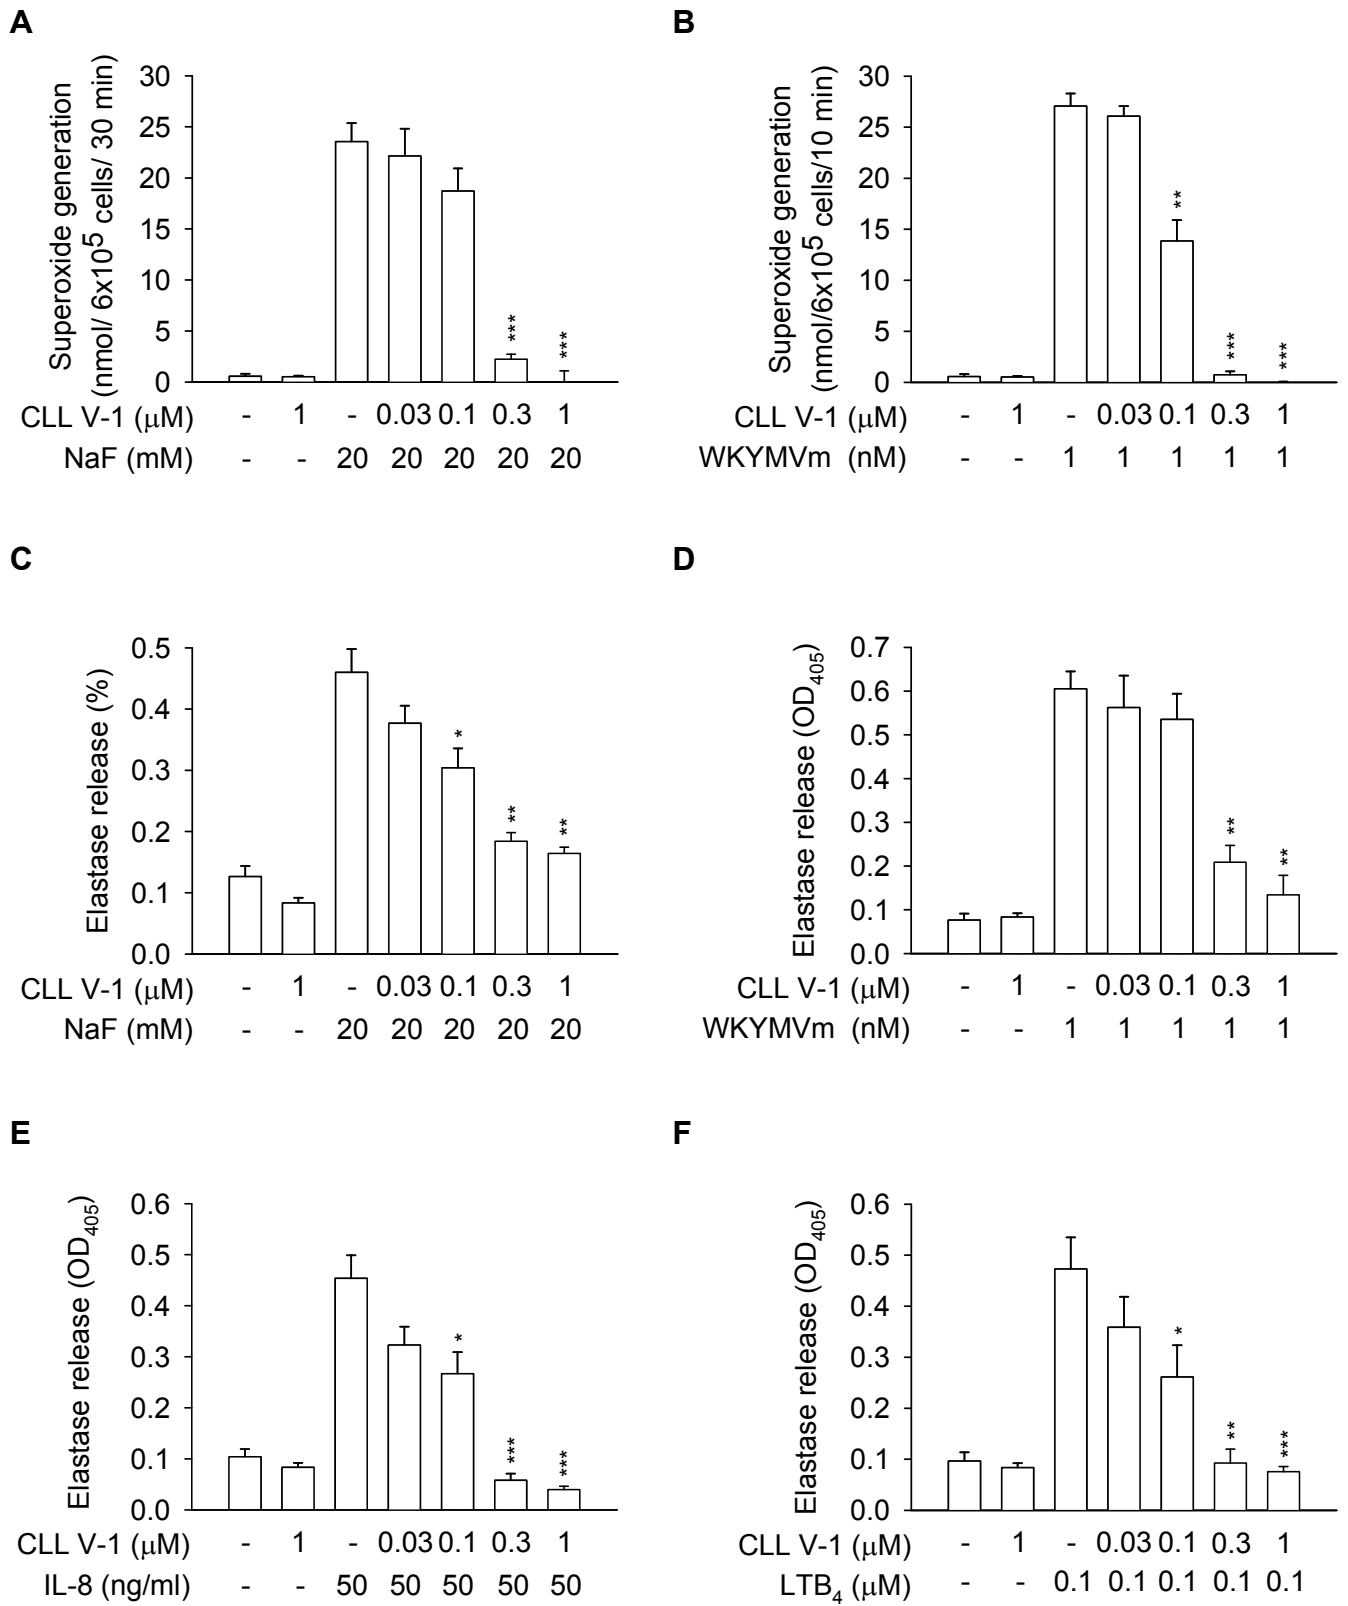

# Figure supplement 4

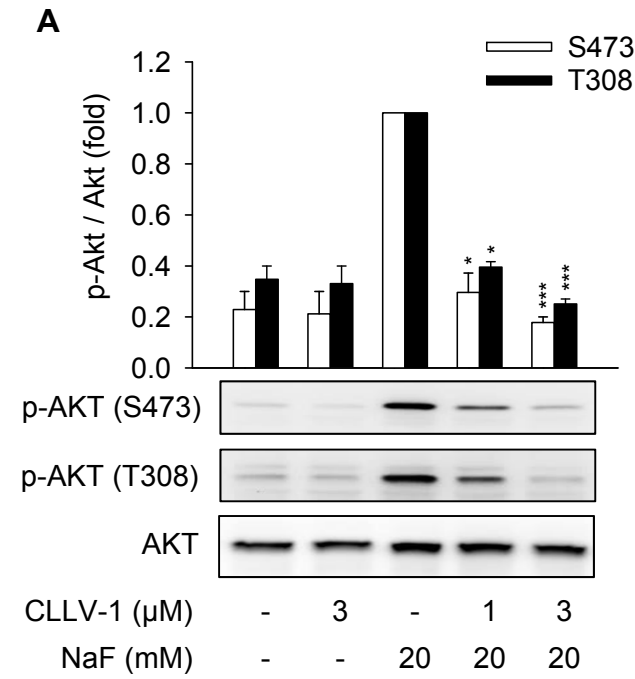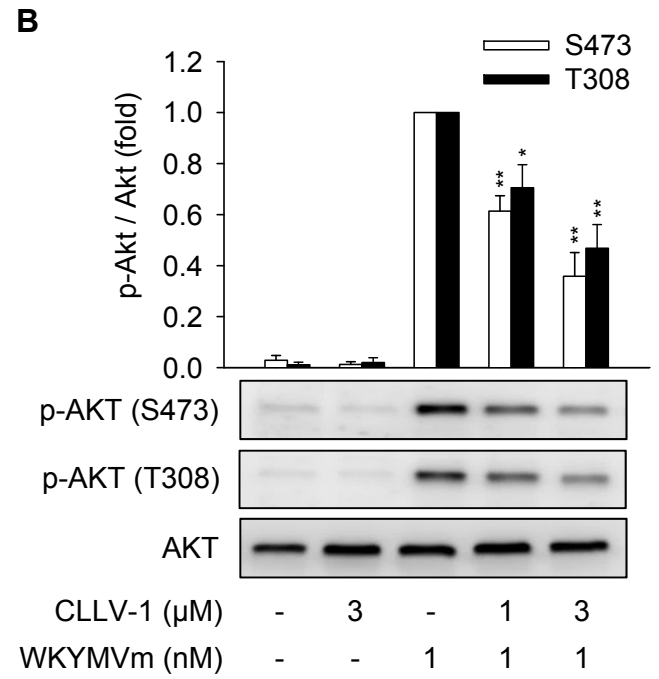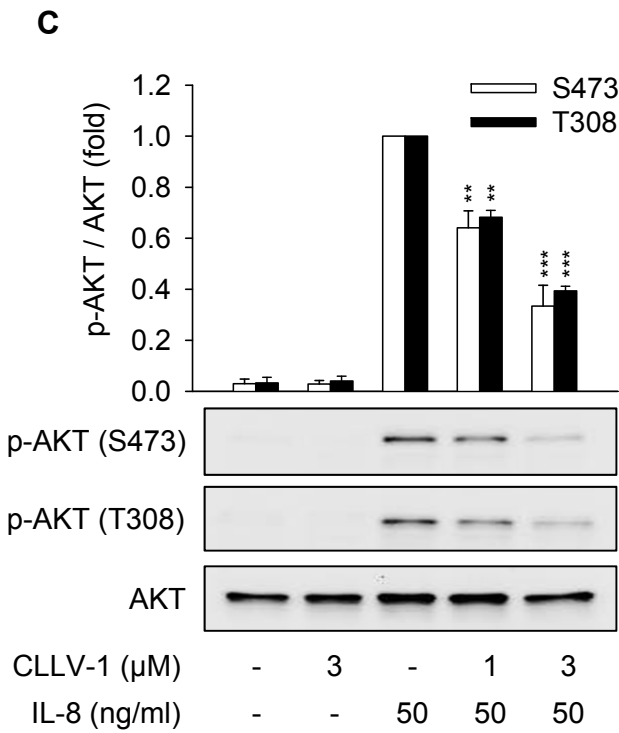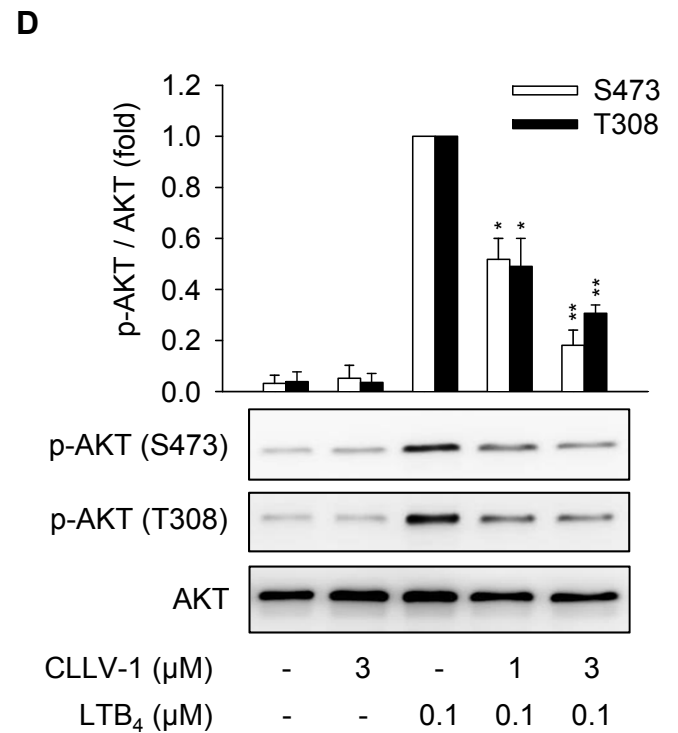

# Figure supplement 5

**A**

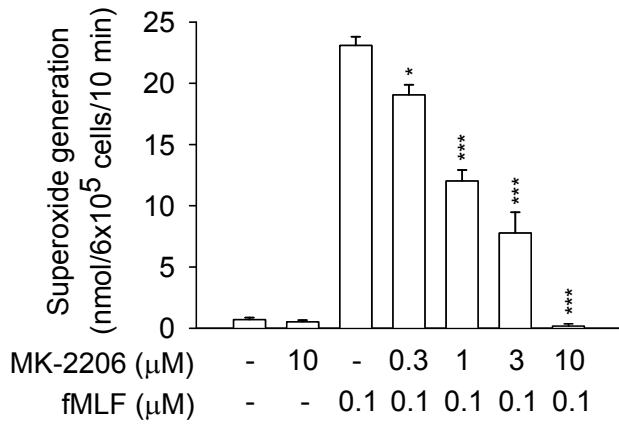

**B**

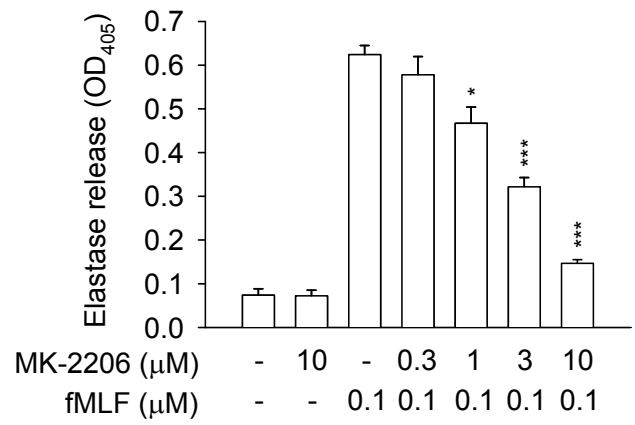

**C**

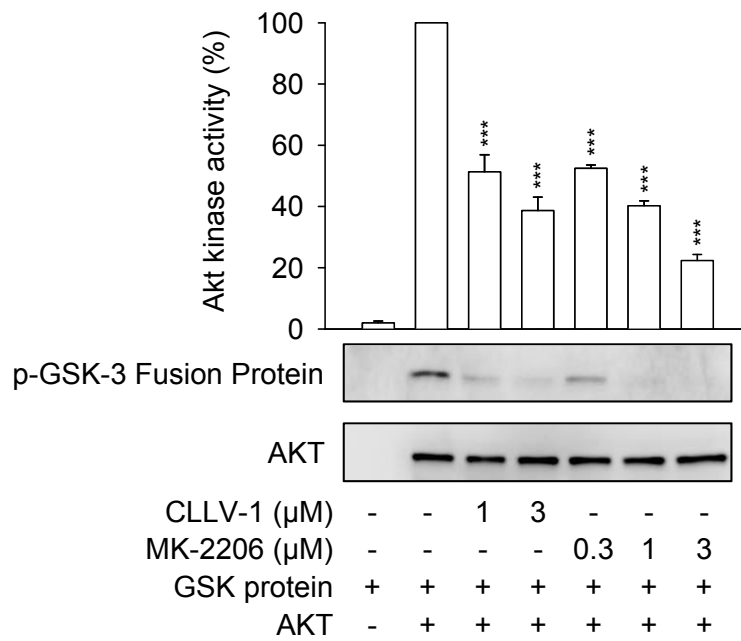

**Figure supplement 6**

Undifferentiated  
HL-60 cells (D0)

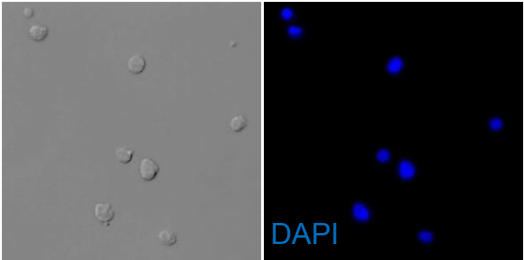

DMSO-differentiated  
dHL-60 cells (D5)

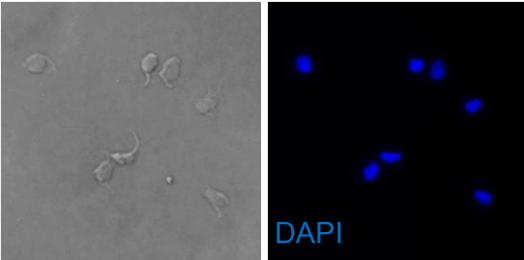

# Figure supplement 7

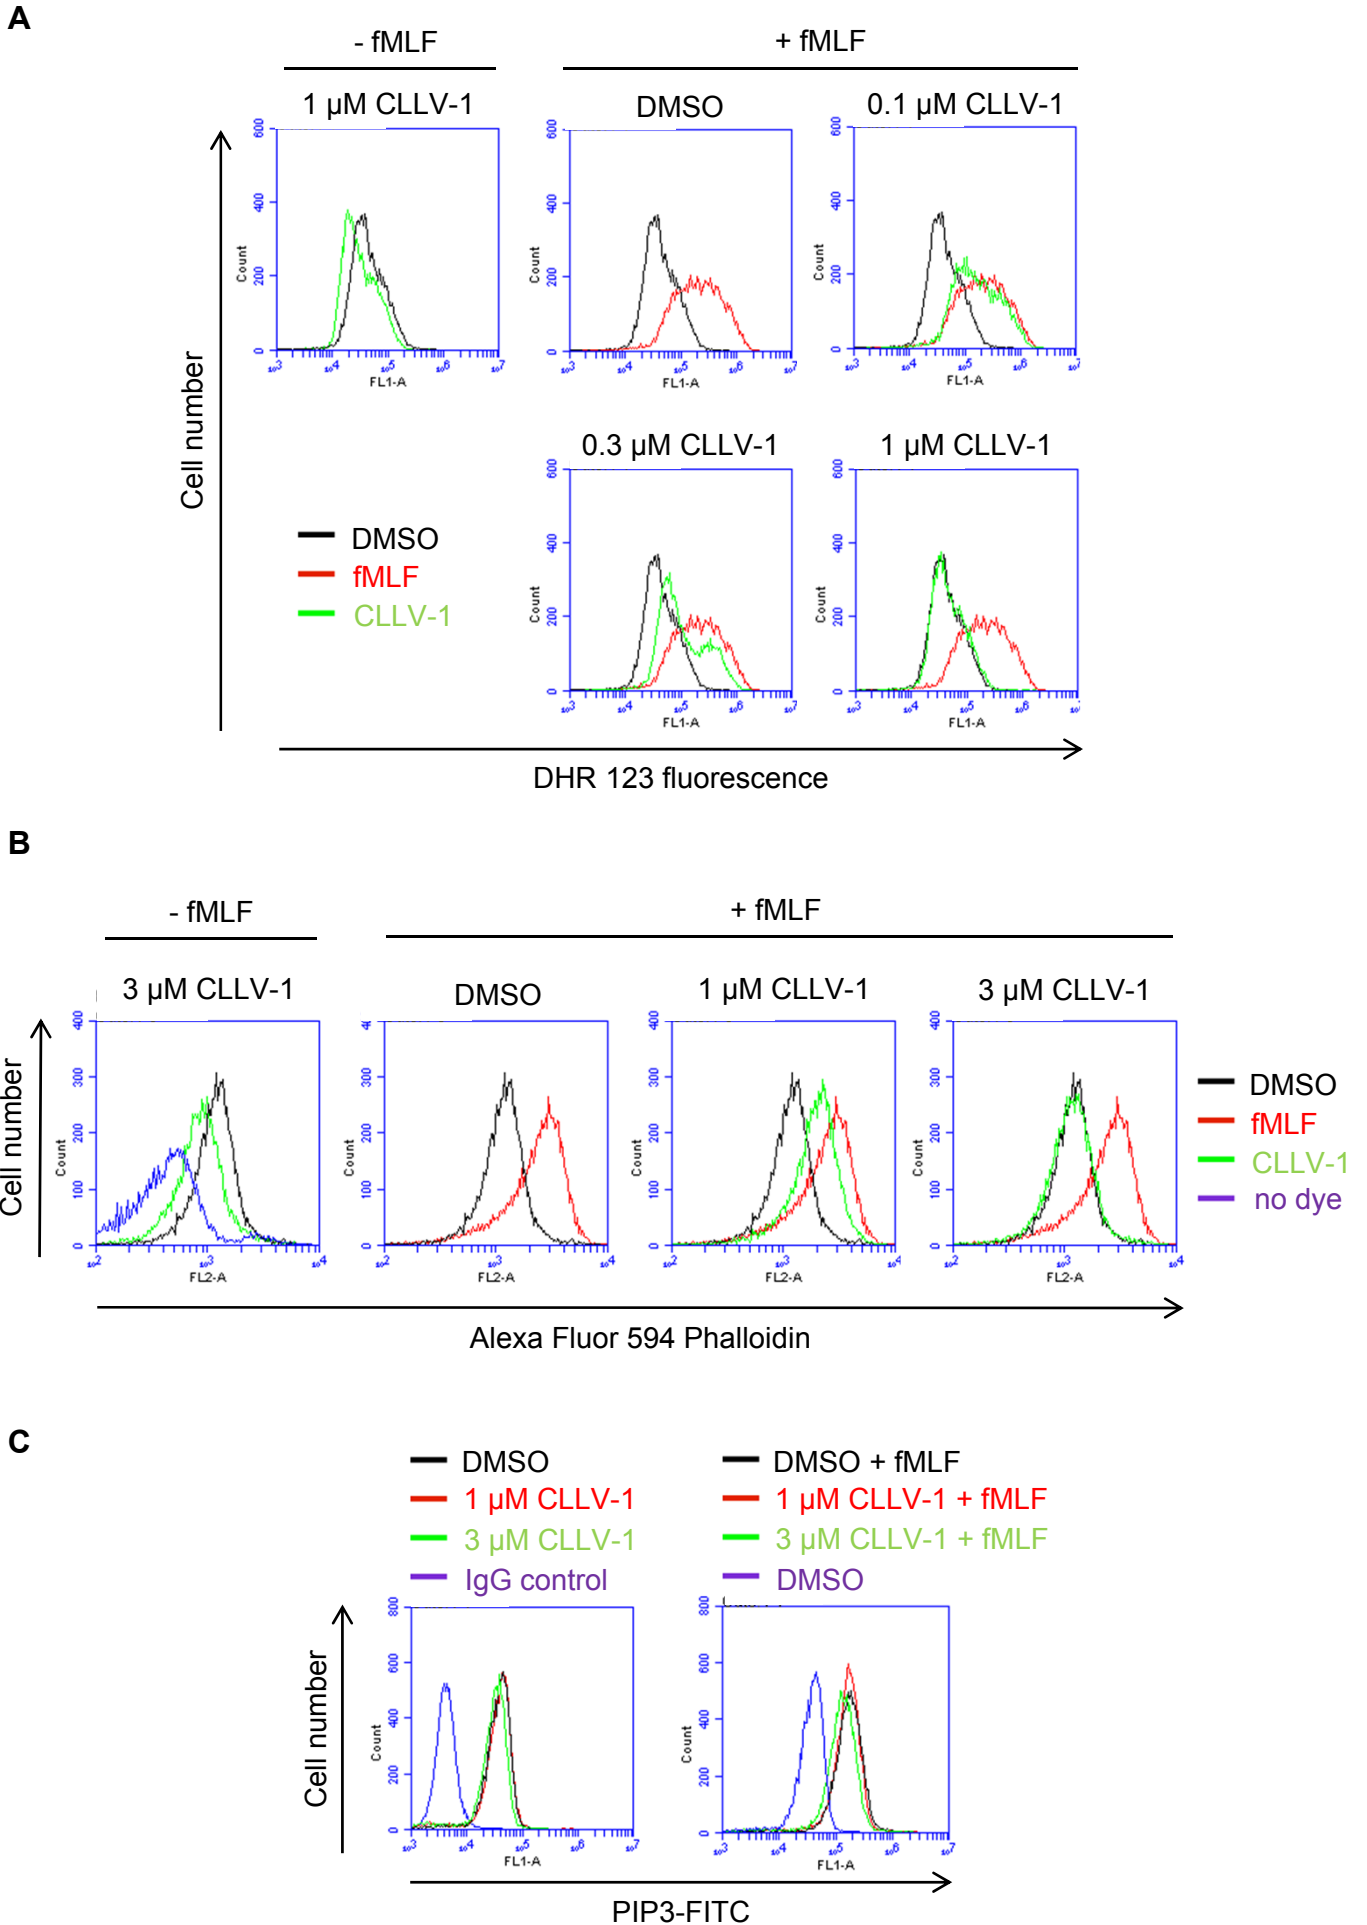

## Figure supplement 8

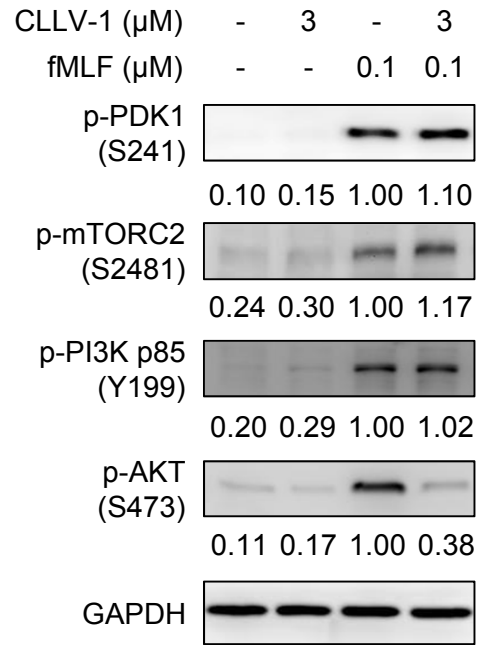



# Figure supplement 9

**A**

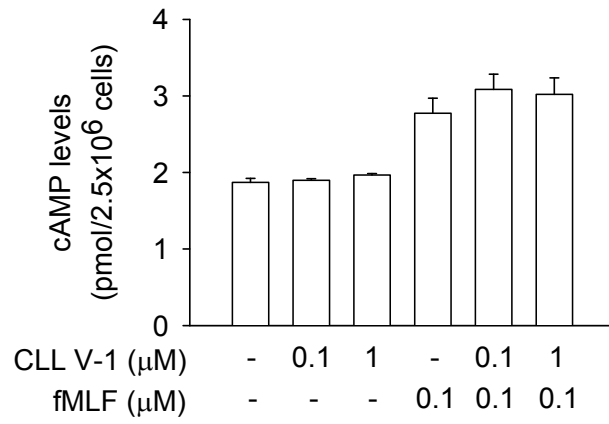

**B**

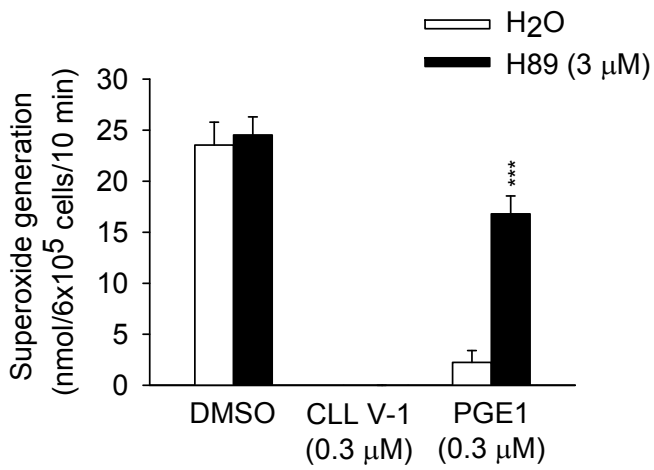

**C**

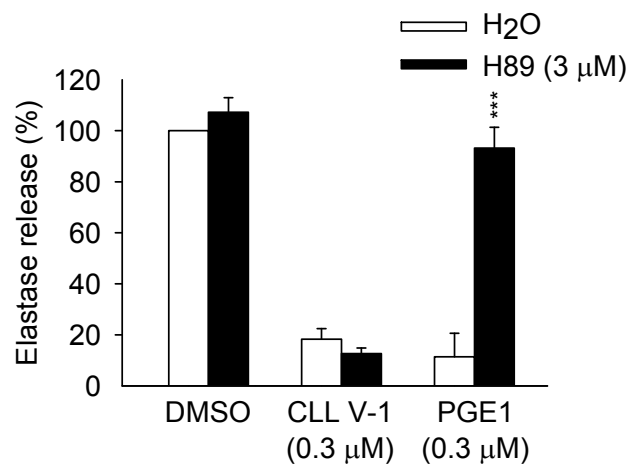

# Figure supplement 10

**A**

CLLV-1

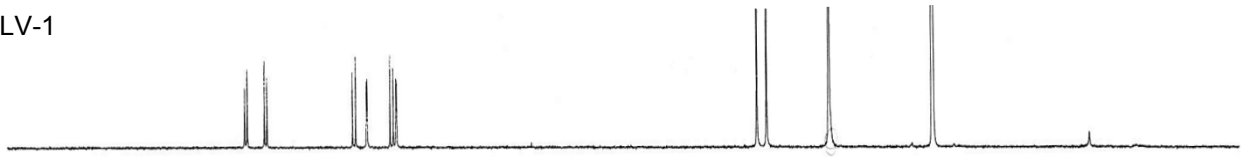

AKT<sub>304-308</sub>

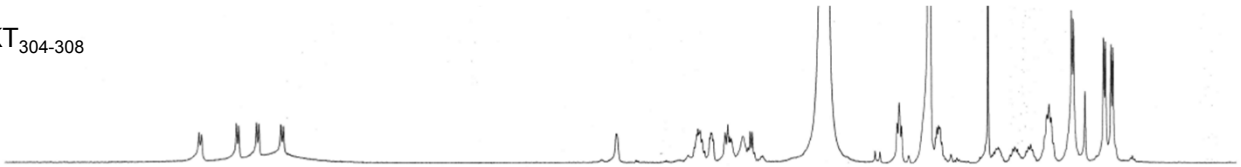

AKT<sub>304-308</sub> + CLLV-1

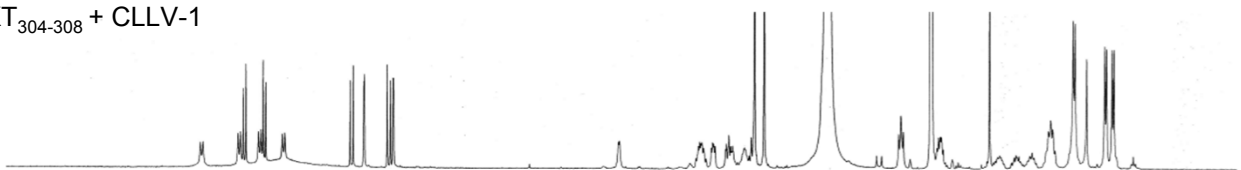

AKT<sub>314-318</sub>

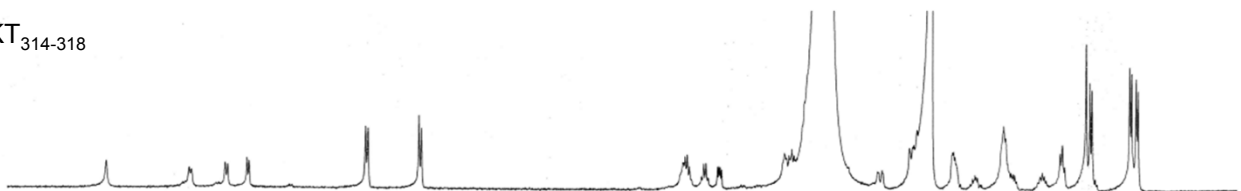

AKT<sub>314-318</sub> + CLLV-1

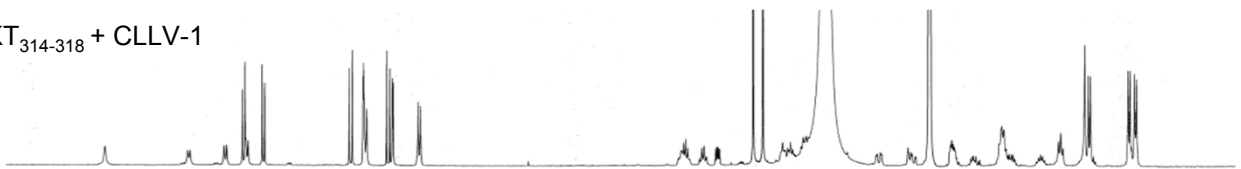

9.5 9.0 8.5 8.0 7.5 7.0 6.5 6.0 5.5 5.0 4.5 4.0 3.5 3.0 2.5 2.0 1.5 1.0 ppm

**B**

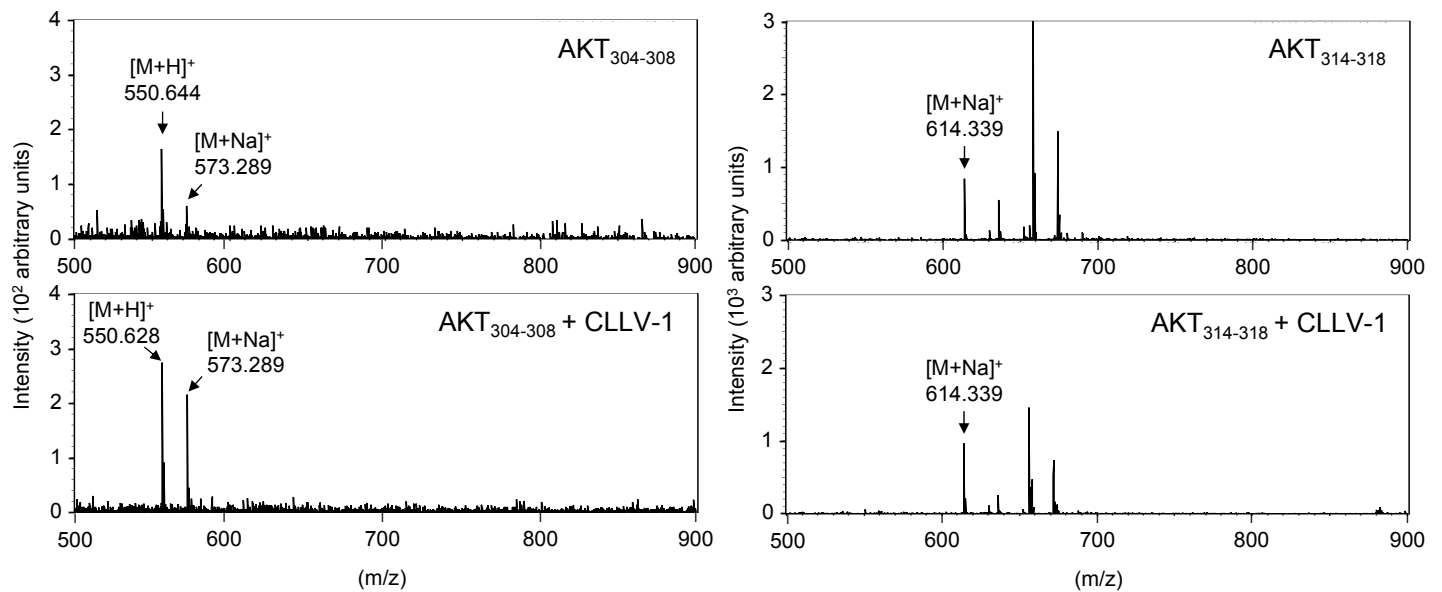

Supplement: Supplementary file [file 264184-1.pdf]
